# Supplementary material for: Structural basis of SNAPc-dependent snRNA transcription initiation by RNA polymerase II
Source: PubMed Central journal article supplement (PMC9758055; doi:10.1038/s41594-022-00857-w), 2022-11-24
Supplement: 41594_2022_857_MOESM4_ESM.pdf [file 41594_2022_857_MOESM4_ESM.pdf]

Figure 1-a

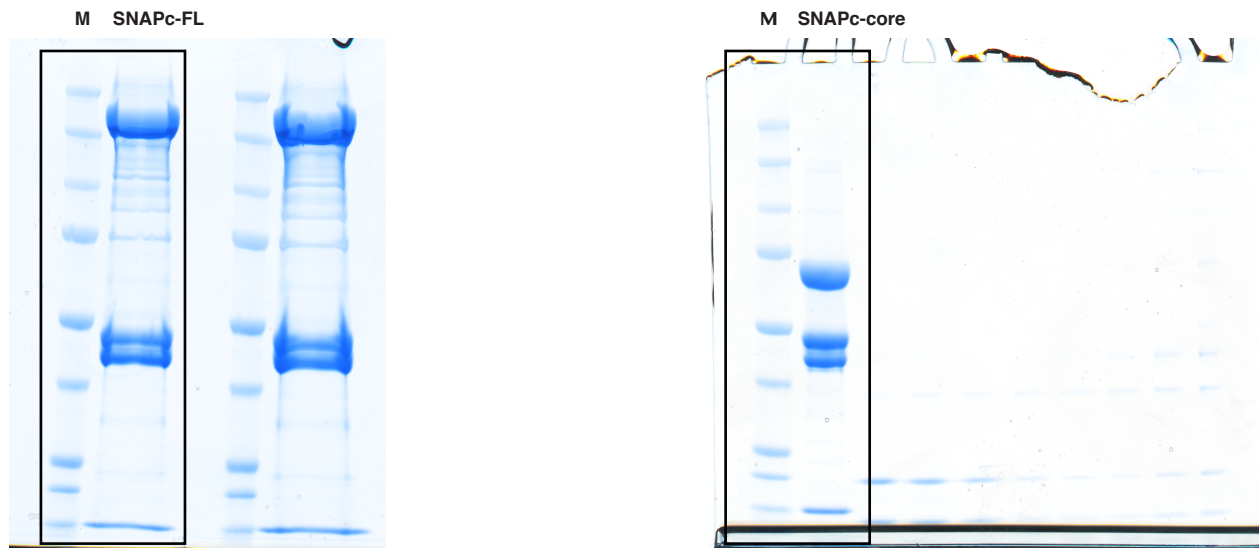

Figure 1-c

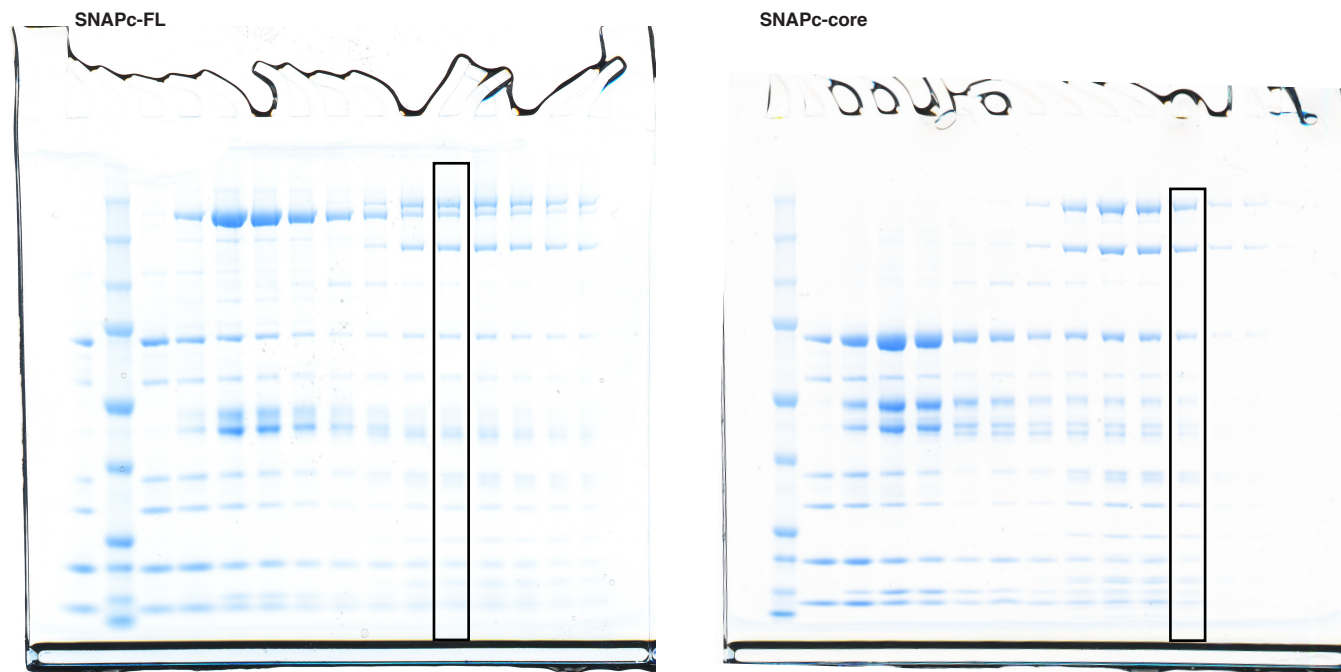

Figures: Source data of SDS\_PAGE gels presented in Figures 1a, 1c. Black boxes represent the lane used in the in the respective figure.

**Figure 1-b**

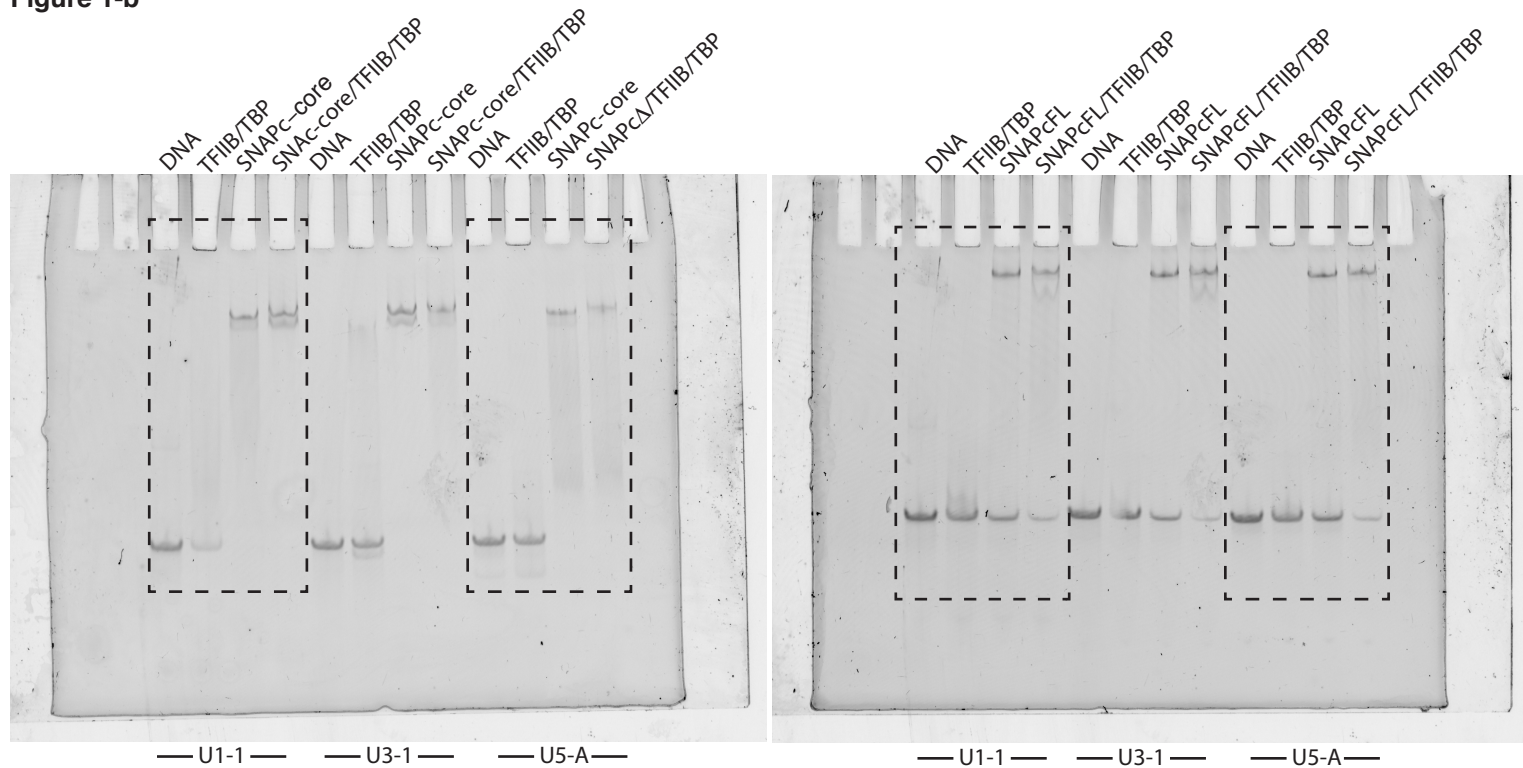

**Figures: Source data of SDS\_PAGE gels presented in Figures 1b. Dashed boxes represent the lanes used in the in the figure.**

### Replicate 1:

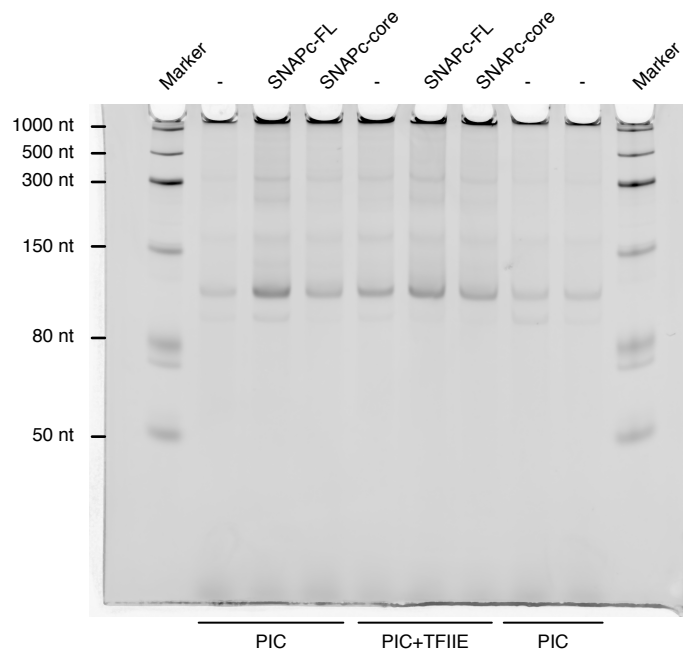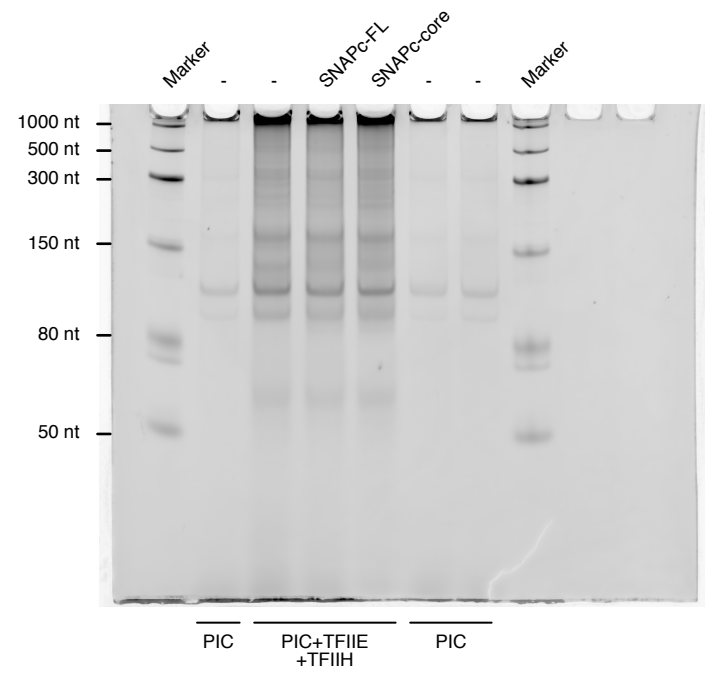

### Replicate 2:

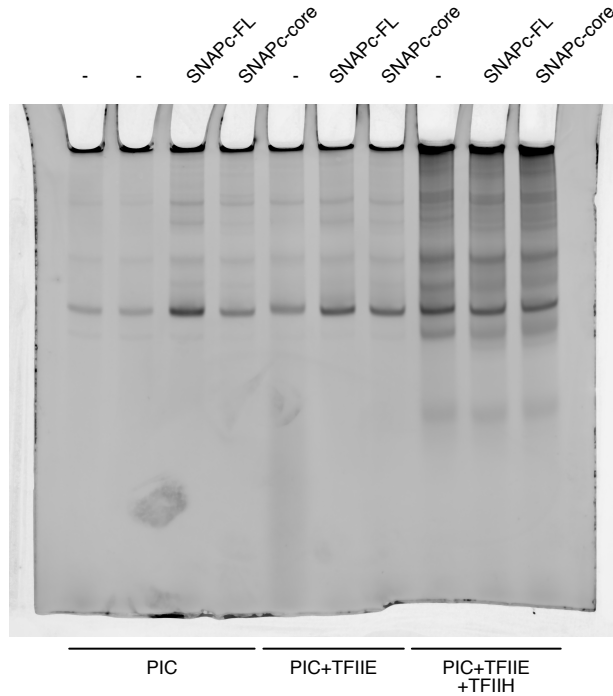

### Replicate 3:

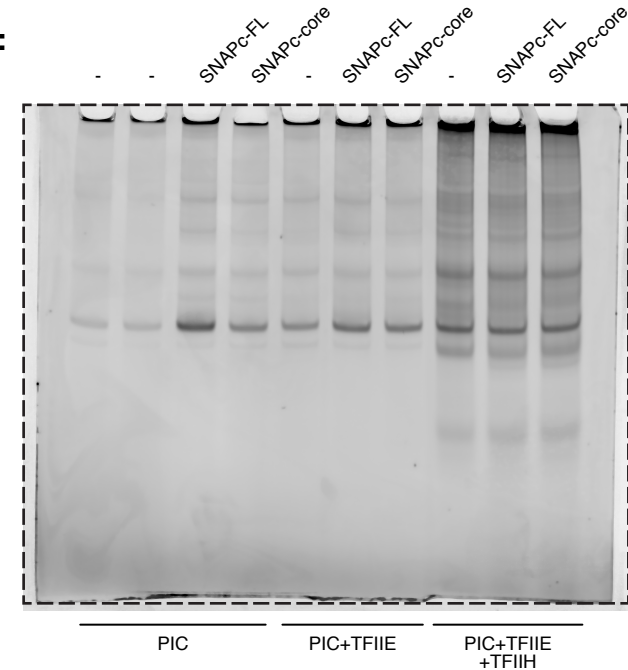

Figures: Source data of Urea-PAGE gels presented in Figures 1d, and the three replicates used for quantification in Figure 1e. Replicate 3 used in Figure 1d is highlighted in a dashed black box.
